# Supplementary material
Source: HighWire-hosted journal article supplement (http://www.ajnr.org/highwire/filestream/52816/field_highwire_adjunct_files/0/16-00243.pdf)
Supplement: 16-00243.pdf [file 16-00243.pdf]

**On-line Table: Relevant scan protocols for CTA and DSA from all centers in this substudy**

| Center No. | CTA      |                        |                                      | DSA       |                    |                                                   |
|------------|----------|------------------------|--------------------------------------|-----------|--------------------|---------------------------------------------------|
|            | Sections | Section Thickness (mm) | Contrast Injection (total mL) (mL/s) | Plane     | Contrast Injection | Contrast Injection if Automatic (total mL) (mL/s) |
| 1          | 64       | 1.5/0.6                | 80 (5.0)                             | Biplane   | Both               | 8.0 (4.0)                                         |
| 2          | 128      | 1.0/0.6                | 60 (4.0)                             | Biplane   | Manual             | NA                                                |
| 3          | 128      | 0.5/0.5                | 70 (5.0)                             | Monoplane | Automatic          | 6.0 (3.0)                                         |
| 4          | 128      | 1.0/0.7                | 76 (5.6)                             | Monoplane | Both               | 8.0 (4.0)                                         |
| 5          | 320      | 1.0/0.8                | 70 (4.0)                             | Biplane   | Manual             | NA                                                |
| 6          | 128      | 0.625                  | 70 (4.0)                             | Monoplane | Automatic          | 8.0 (4.0)                                         |
| 7          | 256      | 1.0/0.5                | 80 (5.0)                             | Monoplane | Manual             | NA                                                |
| 8          | 128      | 3.0/1.0                | 60 (4.0)                             | Monoplane | Both               | 11.0 (6.0)                                        |
| 9          | 128      | 0.625                  | 70 (5.0)                             | Biplane   | Both               | 6.0 (3.0)                                         |
| 10         | 128      | 1.5/1.0                | 100 (5.0)                            | Monoplane | Automatic          | 8.0 (4.0)                                         |
| 11         | 256      | 2.0                    | 90 (4.0)                             | Monoplane | Both               | 8.0 (4.0/3.0)                                     |

**Note:**—NA indicates not applicable.
